# Supplementary material for: Increased incidence of motor neuron disease in Sweden: a population-based study during 2002–2021
Source: Springer Nature journal article supplement (doi:10.1007/s00415-024-12219-1), 2024-02-22
Supplement: MOESM1 [file 26764954]

## Supplementary material

### *Increased incidence of motor neuron disease in Sweden: a population-based study during 2002-2021*

**Supplementary Table 1** Summary table of cases of motor neuron disease per age group and sex. Aggregated for all regions and the entire study period of 2002-2021

|                                | Age group |        |        |        |        |        |        |        |        |        |        |        |        |        |       |       |       |       |       |      | Total   |  |
|--------------------------------|-----------|--------|--------|--------|--------|--------|--------|--------|--------|--------|--------|--------|--------|--------|-------|-------|-------|-------|-------|------|---------|--|
|                                | 0-4       | 5-9    | 10-14  | 15-19  | 20-24  | 25-29  | 30-34  | 35-39  | 40-44  | 45-49  | 50-54  | 55-59  | 60-64  | 65-69  | 70-74 | 75-79 | 80-84 | 85-89 | 90-94 | 95+  |         |  |
| <b>Men</b>                     |           |        |        |        |        |        |        |        |        |        |        |        |        |        |       |       |       |       |       |      |         |  |
| 100 000 person-years           | 55.24     | 56.04  | 57.58  | 59.43  | 61.32  | 64.12  | 64.36  | 64.82  | 65.21  | 64.50  | 62.63  | 60.89  | 57.43  | 50.98  | 42.51 | 31.89 | 21.69 | 12.00 | 4.35  | 0.87 | 957.85  |  |
| Cases                          | 1         | 2      | 2      | 8      | 15     | 18     | 29     | 55     | 91     | 150    | 245    | 458    | 558    | 698    | 797   | 682   | 430   | 198   | 36    | 4    | 4477    |  |
| Cases per 100 000 person-years | 0.02      | 0.04   | 0.03   | 0.13   | 0.24   | 0.28   | 0.45   | 0.85   | 1.40   | 2.33   | 3.91   | 7.52   | 9.72   | 13.69  | 18.75 | 21.39 | 19.83 | 16.51 | 8.28  | 4.62 | 4.67    |  |
| <b>Women</b>                   |           |        |        |        |        |        |        |        |        |        |        |        |        |        |       |       |       |       |       |      |         |  |
| 100 000 person-years           | 52.25     | 53.07  | 54.54  | 55.69  | 57.64  | 61.07  | 61.50  | 62.15  | 62.85  | 62.50  | 61.09  | 60.03  | 57.35  | 52.28  | 45.84 | 37.72 | 30.02 | 20.63 | 9.95  | 2.96 | 961.11  |  |
| Cases                          | 3         | 3      | 3      | 5      | 12     | 10     | 14     | 32     | 50     | 96     | 147    | 261    | 373    | 526    | 594   | 552   | 386   | 210   | 49    | 2    | 3328    |  |
| Cases per 100 000 person-years | 0.06      | 0.06   | 0.06   | 0.09   | 0.21   | 0.16   | 0.23   | 0.51   | 0.80   | 1.54   | 2.41   | 4.35   | 6.50   | 10.06  | 12.96 | 14.63 | 12.86 | 10.18 | 4.92  | 0.68 | 3.46    |  |
| <b>Total</b>                   |           |        |        |        |        |        |        |        |        |        |        |        |        |        |       |       |       |       |       |      |         |  |
| 100 000 person-years           | 107.49    | 109.10 | 112.13 | 115.12 | 118.96 | 125.19 | 125.85 | 126.97 | 128.05 | 127.00 | 123.72 | 120.92 | 114.78 | 103.25 | 88.35 | 69.61 | 51.71 | 32.62 | 14.30 | 3.83 | 1918.96 |  |
| Cases                          | 4         | 5      | 5      | 13     | 27     | 28     | 43     | 87     | 141    | 246    | 392    | 719    | 931    | 1224   | 1391  | 1234  | 816   | 408   | 85    | 6    | 7805    |  |
| Cases per 100 000 person-years | 0.04      | 0.05   | 0.04   | 0.11   | 0.22   | 0.22   | 0.34   | 0.68   | 1.10   | 1.95   | 3.18   | 5.96   | 8.09   | 11.75  | 15.69 | 17.72 | 15.82 | 12.46 | 5.81  | 1.62 | 4.07    |  |

**Supplementary Table 2** Summary table of regional incidence rates of motor neuron disease during 2002-2021. The chi-squared test analysing the statistical significance of the difference yielded a p-value of 0.98

|                                                                                     | Region, south-north |          |           |         |        |           |         |                 |              |          |         |              |             |           |         |         |           |          |                |              |           |
|-------------------------------------------------------------------------------------|---------------------|----------|-----------|---------|--------|-----------|---------|-----------------|--------------|----------|---------|--------------|-------------|-----------|---------|---------|-----------|----------|----------------|--------------|-----------|
|                                                                                     | Skåne               | Blekinge | Kronoberg | Halland | Kalmar | Jönköping | Gotland | Västra Götaland | Östergötland | Värmland | Örebro  | Södermanland | Västmanland | Stockholm | Uppsala | Dalarna | Gävleborg | Jämtland | Västernorrland | Västerbotten | Norrbottn |
| Aggregated greater area                                                             | South               | South    | South     | South   | South  | South     | South   | South           | South        | Central  | Central | Central      | Central     | Central   | Central | Central | North     | North    | North          | North        | North     |
| 100 000 inhabitants in 2012                                                         | 12.62               | 1.52     | 1.86      | 3.04    | 2.33   | 3.39      | 0.57    | 15.99           | 4.33         | 2.73     | 2.83    | 2.74         | 2.56        | 21.23     | 3.41    | 2.76    | 2.76      | 1.26     | 2.42           | 2.60         | 2.49      |
| Average number of cases per year                                                    | 50.1                | 6.95     | 7.1       | 12.15   | 8.75   | 13.85     | 2.7     | 65.75           | 14.65        | 13.65    | 13.35   | 10.65        | 12.1        | 73.85     | 13.15   | 11.35   | 13.15     | 5.35     | 11.35          | 15.55        | 14.1      |
| Average incidence rate                                                              | 3.97                | 4.56     | 3.82      | 4.00    | 3.75   | 4.09      | 4.71    | 4.11            | 3.38         | 5.00     | 4.72    | 3.88         | 4.73        | 3.48      | 3.85    | 4.11    | 4.76      | 4.24     | 4.69           | 5.98         | 5.67      |
| Expected number of cases bases on the average incidence rate for all regions (4.36) | 55.0                | 6.6      | 8.1       | 13.2    | 10.2   | 14.8      | 2.5     | 69.7            | 18.9         | 11.9     | 12.3    | 11.9         | 11.2        | 92.5      | 14.9    | 12.0    | 12.0      | 5.5      | 10.5           | 11.3         | 10.8      |

**Supplementary Table 3** Summary table of aggregated greater area incidence rates of motor neuron disease. The chi-square test analysing the statistical significance of the difference yielded a p-value of 0.08

|                                                                                                      | Aggregated greater area |         |       |
|------------------------------------------------------------------------------------------------------|-------------------------|---------|-------|
|                                                                                                      | South                   | Central | North |
| 100 000 inhabitants in 2012                                                                          | 45.65                   | 38.26   | 11.53 |
| Average number of cases per year                                                                     | 182                     | 148.1   | 59.5  |
| Average incidence rate                                                                               | 3.99                    | 3.87    | 5.16  |
| Expected number of cases bases on the average incidence rate for all aggregated greater areas (4.34) | 198                     | 166     | 50    |

**Supplementary Table 4** Comparison between motor neuron disease case numbers in the SNPR and the SMND in the Stockholm region during 2017-2021

|           | SNPR,<br>including ICD-10 G12.2. |            |       | SMNDR,<br>including ALS, PLS, PSMA, and Kennedy<br>disease. |            |       |
|-----------|----------------------------------|------------|-------|-------------------------------------------------------------|------------|-------|
|           | Men                              | Women      | Total | Men                                                         | Women      | Total |
| 2017      | 41                               | 28         | 69    | 43                                                          | 34         | 77    |
| 2018      | 45                               | 30         | 75    | 38                                                          | 26         | 64    |
| 2019      | 43                               | 33         | 76    | 36                                                          | 26         | 62    |
| 2020      | 50                               | 43         | 93    | 42                                                          | 37         | 79    |
| 2021      | 60                               | 36         | 96    | 49                                                          | 36         | 85    |
| Total (%) | 239 (58.4)                       | 170 (41.6) | 409   | 208 (56.7)                                                  | 159 (43.3) | 367   |

SNPR= Swedish National Patient Register

SMNDR=Swedish Motor Neuron Disease Quality Register

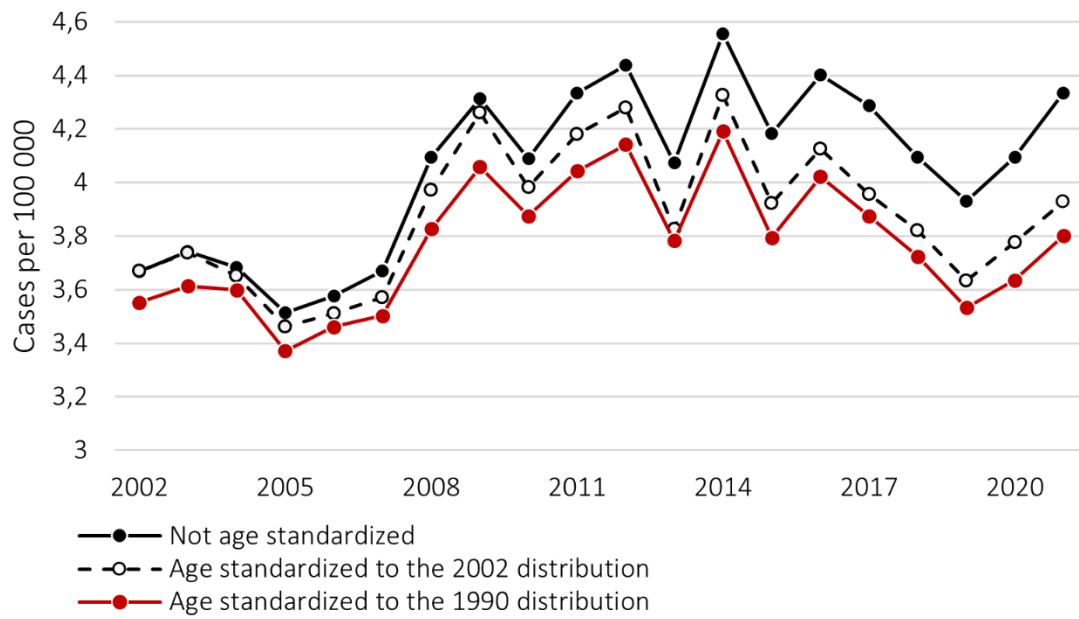

**Supplementary Fig. 1** Reproduction of Fig. 2a with the addition of age standardization to the age distribution of the 1990 Swedish population
